# Supplementary material
Source: HighWire-hosted journal article supplement (https://thorax.bmj.com/content/75/11/1009)
Supplement: inline-supplementary-material-1 [file inline-supplementary-material-1.pdf]

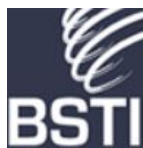

## BSTI Post-COVID-19 CXR Report Codes

### COVID-19-related Findings

#### **Resolved (PCVCX0)**

Normal/No significant persisting COVID changes/Return to Pre-COVID baseline

#### **Significantly improved (PCVCX1)**

≥ 50% abnormalities have resolved (extent and/or density of opacification)

#### **Not significantly improved or unchanged\* (PCVCX2)**

< 50% abnormalities have resolved (extent and/or density of opacification)

#### **Worsening\* (PCVCX3)**

Development of fibrosis, even if alveolar opacity has improved/Deteriorating alveolar opacity

### Other findings

#### **(PCVCX4)**

Lung malignancy<sup>+</sup>; Pneumothorax; Pneumomediastinum; New non-COVID-19 infection / Pleural effusion(s)

\* If any suggestion of malignancy refer to cancer services as per local pathways
