# Supplementary material
Source: HighWire-hosted journal article supplement (https://thorax.bmj.com/content/75/11/1009)
Supplement: inline-supplementary-material-2 [file inline-supplementary-material-2.pdf]

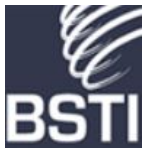

## BSTI Post-COVID-19 CT Report Codes

Consider reporting (a) pattern of disease; (b) signs of fibrosis - including whether present in previous areas of abnormality; (c) extent of disease; (d) distribution of disease – e.g. bilateral, patchy, diffuse.

### COVID-19 related findings

#### **Normal (PCVCT0)**

Normal/return to pre-COVID-19 baseline

#### **Improving (PCVCT1)**

No significant fibrosis or concerning features

#### **Stable (PCVCT2)**

Unchanged/persistent changes from last COVID-19 CT scan

#### **Fibrosis (PCVCT3)**

Fibrosis ± inflammatory change present

(Inflammation > fibrosis/fibrosis > inflammation/fibrosis without inflammation)

### Other findings

#### **Complication or Non-COVID disease (PCVCT4 - use in combination with PVCT0/1/2/3)**

-Pneumothorax; Pneumomediastinum/other

-Non-COVID-19 infection: Lobar pneumonia/cavitation/tree-in-bud/centrilobular nodules/effusions

-ILD not thought related to COVID-19

-Lung malignancy (If any suggestion of malignancy - refer to cancer services as per local pathways)

### Pulmonary Vascular Findings (if appropriate)

#### **No PE (PCVPE0)<sup>+</sup>**

#### **New acute PE (PCVPE1)<sup>\*</sup>**

#### **Chronic PE (PCVPE2)<sup>\*</sup>**

<sup>+</sup>Includes equivocal and non-diagnostic studies

<sup>\*</sup>Assess for right ventricular strain, PH and give RV/LV ratio
